# Supplementary material for: Swimming with multiple propulsors: measurement and comparison of swimming gaits in three species of neotropical cichlids
Source: Oxford University Press journal article supplement (doi:10.1242/jeb.157180), 2017-01-01
Supplement: jeb157180supp.pdf [file jeb157180supp.pdf]

**Table S1. Individuals and trials included in each analysis.** All trials meeting the requirements for a given analysis were included. Species is indicated in the Fish code (Cicoce = *Cichla ocellaris*, Cresax = *Crenicichla saxatilis*, Symaeq = *Symphysodon aequifasciatus*). Numerical column entries are the number of trials for that individual included, with ‘-’ when no trials were available. Avg. Gait Trajectory indicates whether (Y) or not (N) a given fish had sufficient data to be included in Figure 7. Species Gait Trajectory indicates whether the data for a given fish were included in the calculation of the species average trajectory.

| Fish<br>(Total Trials<br>Attempted) | Trans.<br>Speed | Max.<br>Speed | Freq.<br>and<br>Amp. | Avg Gait<br>Trajectory | Species Gait<br>Trajectory |
|-------------------------------------|-----------------|---------------|----------------------|------------------------|----------------------------|
| Cicoce1 (3)                         | 3               | 3             | 1                    | Y                      | Y                          |
| Cicoce2 (3)                         | 3               | 3             | 1                    | Y                      | Y                          |
| Cicoce3 (3)                         | 3               | 3             | 2                    | Y                      | Y                          |
| Cicoce4 (4)                         | 3               | 3             | 2                    | Y                      | Y                          |
| Cicoce5 (3)                         | 3               | 3             | -                    | N                      | N                          |
| Cresax1 (6)                         | 2               | 2             | 2                    | Y                      | Y                          |
| Cresax2 (4)                         | 1               | 1             | 1                    | Y                      | Y                          |
| Cresax3 (4)                         | 1               | -             | -                    | N                      | N                          |
| Symaeq1 (3)                         | 3               | 3             | 2                    | Y                      | Y                          |
| Symaeq2 (3)                         | 3               | 3             | 2                    | Y                      | Y                          |
| Symaeq4 (3)                         | 1               | 1             | -                    | N                      | N                          |
| Symaeq5 (3)                         | 3               | 3             | 2                    | Y                      | Y                          |
| Symaeq10 (2)                        | 2               | 2             | -                    | N                      | N                          |

## Supplementary Information 1

[Click here to Download Supplementary Information 1](#)

## Table S2

[Click here to Download Table S2](#)
